# Supplementary material for: Size-resolved process understanding of stratospheric sulfate aerosol following the Pinatubo eruption
Source: Copernicus journal article supplement (doi:10.5194/egusphere-2024-2227), 2024-07-24
Supplement: Supplementary file 1 [file egusphere-2024-2227-supplement.pdf]

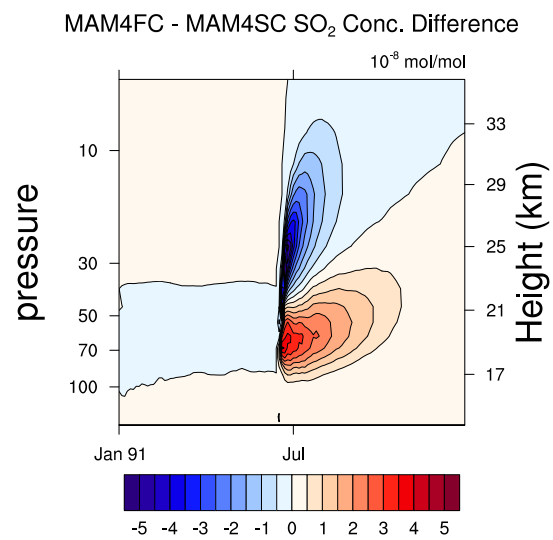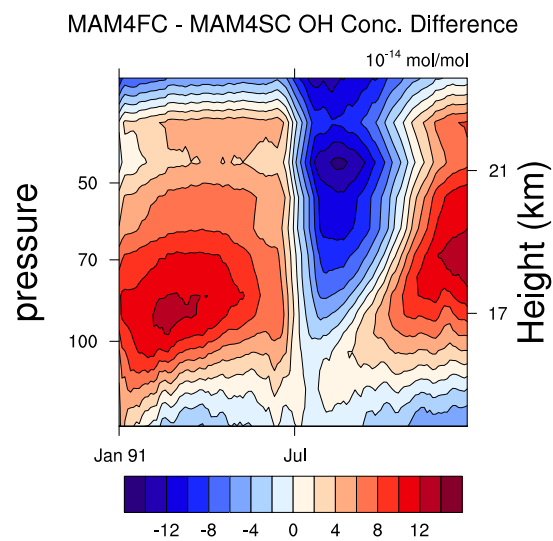

Figure S1: Differences in SO<sub>2</sub> concentrations and OH concentrations between MAM4FC and MAM4SC. The vertical axis represents altitude, while the horizontal axis represents time. Values are averaged over all longitudes and 30S-30N latitudes.

MAM5FC - MAM5SC SO<sub>2</sub> Conc. Difference

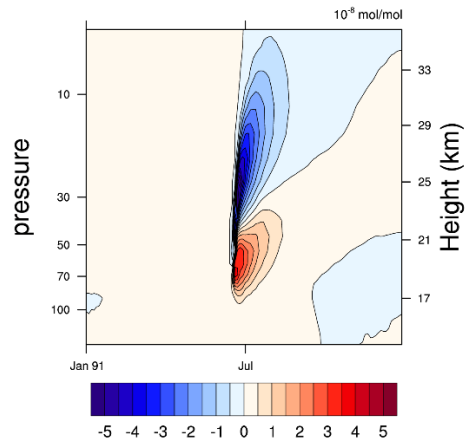

MAM5FC - MAM5SC OH Conc. Difference

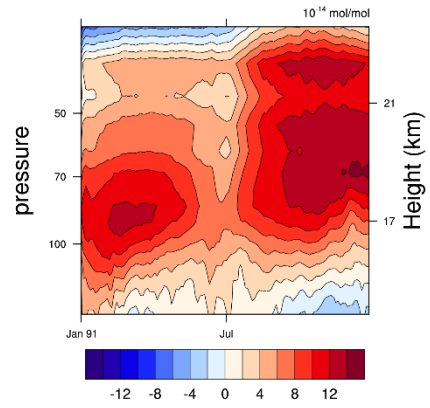

Figure S2: Similar to Figure S1, but with the MAM5 experiments instead.

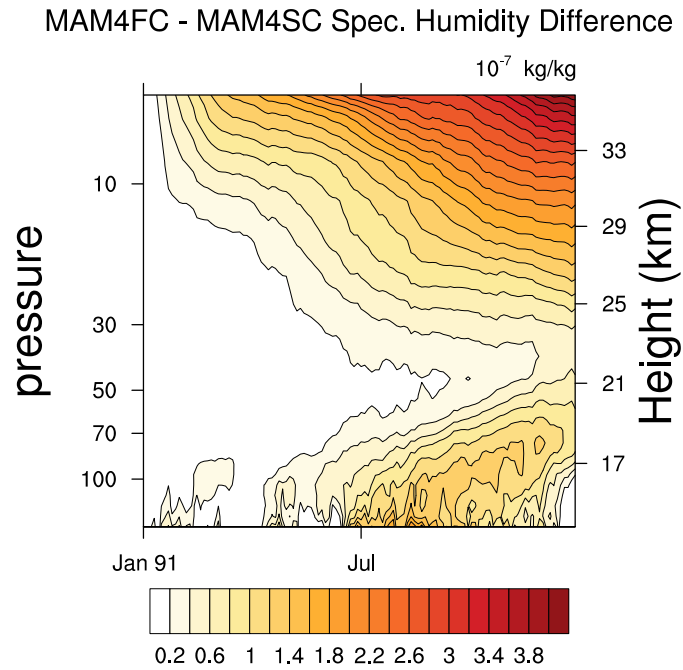

Figure S3: Differences in specific humidity between MAM4FC and MAM4SC. The vertical axis represents altitude, while the horizontal axis represents time. Values are averaged over all longitudes and 30S-30N latitudes.

### MAM5FC - MAM5SC Spec. Humidity Difference

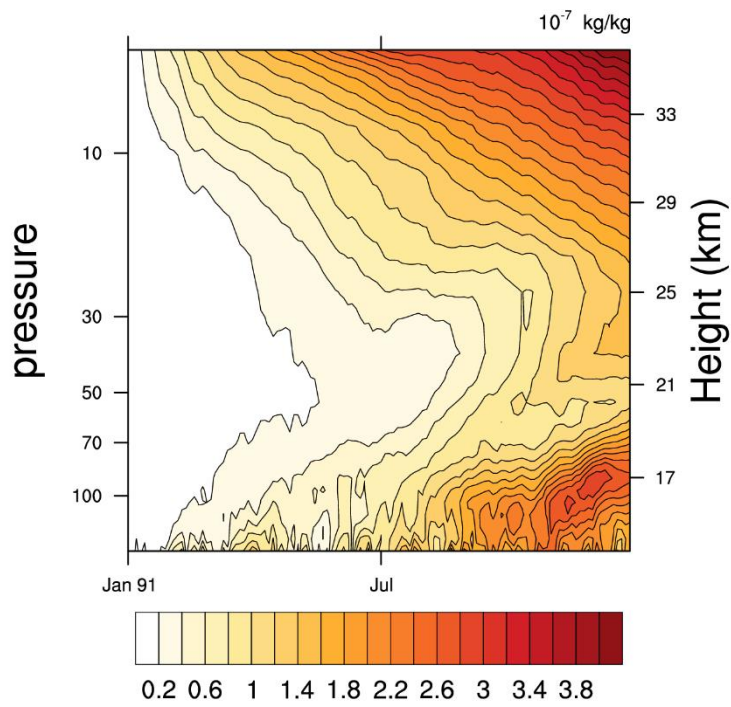

Figure S4. Similar to S3, but the difference in specific humidity in MAM5FC and MAM5SC instead.
